# Supplementary material
Source: MDPI journal article supplement (https://www.mdpi.com/2304-6740/7/2/17)

# checkCIF/PLATON report

Structure factors have been supplied for datablock(s) Compound1, Compound2, Compound3, Compound4, Compound5

THIS REPORT IS FOR GUIDANCE ONLY. IF USED AS PART OF A REVIEW PROCEDURE FOR PUBLICATION, IT SHOULD NOT REPLACE THE EXPERTISE OF AN EXPERIENCED CRYSTALLOGRAPHIC REFEREE.

No syntax errors found.      CIF dictionary      Interpreting this report

## Datablock: Compound1

---

Bond precision:    C-C = 0.0050 A                      Wavelength=0.71069

Cell:                      a=9.0847(6)                      b=10.5878(8)                      c=13.3058(9)  
                                alpha=70.313(3)                      beta=82.104(3)                      gamma=76.733(3)  
Temperature:    150 K

|                | Calculated     | Reported       |
|----------------|----------------|----------------|
| Volume         | 1170.35(14)    | 1170.35(14)    |
| Space group    | P -1           | P -1           |
| Hall group     | -P 1           | -P 1           |
| Moiety formula | C13 H11 N O4 S | ?              |
| Sum formula    | C13 H11 N O4 S | C13 H11 N O4 S |
| Mr             | 277.29         | 277.29         |
| Dx,g cm-3      | 1.574          | 1.574          |
| Z              | 4              | 4              |
| Mu (mm-1)      | 0.286          | 0.286          |
| F000           | 576.0          | 576.0          |
| F000'          | 576.79         |                |
| h,k,lmax       | 10,12,16       | 10,12,16       |
| Nref           | 4283           | 4194           |
| Tmin,Tmax      | 0.960,0.977    | 0.887,0.978    |
| Tmin'          | 0.884          |                |

Correction method= # Reported T Limits: Tmin=0.887 Tmax=0.978  
AbsCorr = MULTI-SCAN

Data completeness= 0.979                      Theta(max)= 25.348

R(reflections)= 0.0510( 2554)                      wR2(reflections)= 0.1129( 4194)

S = 0.919                      Npar= 349

---

The following ALERTS were generated. Each ALERT has the format

**test-name\_ALERT\_alert-type\_alert-level.**

Click on the hyperlinks for more details of the test.

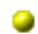

### Alert level C

|                                                             |       |         |        |
|-------------------------------------------------------------|-------|---------|--------|
| PLAT029_ALERT_3_C _diffn_measured_fraction_theta_full       | Low   | 0.979   | Note   |
| PLAT340_ALERT_3_C Low Bond Precision on C-C Bonds           |       | 0.00504 | Ang.   |
| PLAT906_ALERT_3_C Large K value in the Analysis of Variance |       | 5.834   | Check  |
| PLAT911_ALERT_3_C Missing # FCF Refl Between THmin & STh/L= | 0.600 | 83      | Report |

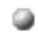

### Alert level G

|                                                                    |       |       |              |
|--------------------------------------------------------------------|-------|-------|--------------|
| PLAT002_ALERT_2_G Number of Distance or Angle Restraints on AtSite |       | 4     | Note         |
| PLAT007_ALERT_5_G Number of Unrefined Donor-H Atoms                |       | 2     | Report       |
| PLAT066_ALERT_1_G Predicted and Reported Tmin&Tmax Range Identical |       | ?     | Check        |
| PLAT154_ALERT_1_G The s.u.'s on the Cell Angles are Equal ..(Note) |       | 0.003 | Degree       |
| PLAT172_ALERT_4_G The CIF-Embedded .res File Contains DFIX Records |       | 2     | Report       |
| PLAT432_ALERT_2_G Short Inter X...Y Contact O13 .. C7 ..           |       | 2.93  | Ang.         |
| PLAT432_ALERT_2_G Short Inter X...Y Contact O21 .. C27 ..          |       | 2.81  | Ang.         |
| PLAT860_ALERT_3_G Number of Least-Squares Restraints               |       | 2     | Note         |
| PLAT910_ALERT_3_G Missing # of FCF Reflection(s) Below Th(Min) ... |       | 4     | Report       |
| PLAT912_ALERT_4_G Missing # of FCF Reflections Above STh/L=        | 0.600 | 3     | Note         |
| PLAT961_ALERT_5_G Dataset Contains no Negative Intensities         |       |       | Please Check |

0 **ALERT level A** = Most likely a serious problem - resolve or explain  
0 **ALERT level B** = A potentially serious problem, consider carefully  
4 **ALERT level C** = Check. Ensure it is not caused by an omission or oversight  
11 **ALERT level G** = General information/check it is not something unexpected

2 ALERT type 1 CIF construction/syntax error, inconsistent or missing data  
3 ALERT type 2 Indicator that the structure model may be wrong or deficient  
6 ALERT type 3 Indicator that the structure quality may be low  
2 ALERT type 4 Improvement, methodology, query or suggestion  
2 ALERT type 5 Informative message, check

## Datablock: Compound2

Bond precision: C-C = 0.0047 A

Wavelength=0.71073

Cell: a=9.5036(4) b=18.3619(8) c=11.3390(5)

alpha=90 beta=91.883(2) gamma=90

Temperature: 150 K

|                | Calculated         | Reported           |
|----------------|--------------------|--------------------|
| Volume         | 1977.63(15)        | 1977.63(15)        |
| Space group    | P 21/n             | P 21/n             |
| Hall group     | -P 2yn             | -P 2yn             |
| Moiety formula | C20 H20 Cu N2 O5 S | C20 H20 Cu N2 O5 S |
| Sum formula    | C20 H20 Cu N2 O5 S | C20 H20 Cu N2 O5 S |
| Mr             | 463.99             | 463.98             |
| Dx,g cm-3      | 1.558              | 1.558              |
| Z              | 4                  | 4                  |
| Mu (mm-1)      | 1.245              | 1.245              |
| F000           | 956.0              | 956.0              |
| F000'          | 958.14             |                    |
| h,k,lmax       | 11,22,13           | 11,22,13           |
| Nref           | 3632               | 3629               |
| Tmin,Tmax      | 0.787,0.861        | 0.791,0.871        |
| Tmin'          | 0.723              |                    |

Correction method= # Reported T Limits: Tmin=0.791 Tmax=0.871  
AbsCorr = MULTI-SCAN

Data completeness= 0.999                      Theta(max)= 25.357

R(reflections)= 0.0373( 2759)              wR2(reflections)= 0.0838( 3629)

S = 1.017                                      Npar= 266

The following ALERTS were generated. Each ALERT has the format

**test-name\_ALERT\_alert-type\_alert-level.**

Click on the hyperlinks for more details of the test.

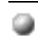

#### Alert level G

PLAT794\_ALERT\_5\_G Tentative Bond Valency for Cu1 (II) ..... 2.18 Note  
PLAT912\_ALERT\_4\_G Missing # of FCF Reflections Above STh/L= 0.600 3 Note

- 0 **ALERT level A** = Most likely a serious problem - resolve or explain
  - 0 **ALERT level B** = A potentially serious problem, consider carefully
  - 0 **ALERT level C** = Check. Ensure it is not caused by an omission or oversight
  - 2 **ALERT level G** = General information/check it is not something unexpected
- 
- 0 ALERT type 1 CIF construction/syntax error, inconsistent or missing data
  - 0 ALERT type 2 Indicator that the structure model may be wrong or deficient
  - 0 ALERT type 3 Indicator that the structure quality may be low
  - 1 ALERT type 4 Improvement, methodology, query or suggestion
  - 1 ALERT type 5 Informative message, check

## Datablock: Compound3

Bond precision: C-C = 0.0044 A

Wavelength=0.71069

Cell: a=8.1099(2) b=29.4538(7) c=10.5303(3)  
 alpha=90 beta=109.3950(9) gamma=90  
 Temperature: 296 K

|                        | Calculated                 | Reported                   |
|------------------------|----------------------------|----------------------------|
| Volume                 | 2372.60(11)                | 2372.60(11)                |
| Space group            | P 21/n                     | P 21/n                     |
| Hall group             | -P 2yn                     | -P 2yn                     |
| Moiety formula         | C23 H17 Cu N3 O4 S, C H4 O | C23 H17 Cu N3 O4 S, C H4 O |
| Sum formula            | C24 H21 Cu N3 O5 S         | C24 H21 Cu N3 O5 S         |
| Mr                     | 527.05                     | 527.04                     |
| Dx, g cm <sup>-3</sup> | 1.475                      | 1.475                      |
| Z                      | 4                          | 4                          |
| Mu (mm <sup>-1</sup> ) | 1.049                      | 1.049                      |
| F000                   | 1084.0                     | 1084.0                     |
| F000'                  | 1086.18                    |                            |
| h,k,lmax               | 10,36,13                   | 10,36,13                   |
| Nref                   | 4835                       | 4826                       |
| Tmin,Tmax              | 0.790,0.890                | 0.800,0.900                |
| Tmin'                  | 0.713                      |                            |

Correction method= # Reported T Limits: Tmin=0.800 Tmax=0.900  
 AbsCorr = MULTI-SCAN

Data completeness= 0.998 Theta(max)= 26.368

R(reflections)= 0.0398( 3903) wR2(reflections)= 0.1028( 4826)

S = 1.007 Npar= 309

The following ALERTS were generated. Each ALERT has the format

**test-name\_ALERT\_alert-type\_alert-level.**

Click on the hyperlinks for more details of the test.

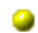

#### Alert level C

|                                                                    |              |
|--------------------------------------------------------------------|--------------|
| PLAT147_ALERT_1_C s.u. on Symmetry Constrained Cell Angle(s) ..... | Please Check |
| PLAT906_ALERT_3_C Large K value in the Analysis of Variance .....  | 5.804 Check  |
| PLAT918_ALERT_3_C Reflection(s) with I(obs) much Smaller I(calc) . | 1 Check      |

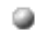

#### Alert level G

|                                                                    |              |
|--------------------------------------------------------------------|--------------|
| PLAT007_ALERT_5_G Number of Unrefined Donor-H Atoms .....          | 1 Report     |
| PLAT605_ALERT_4_G Largest Solvent Accessible VOID in Structure ... | 63 A**3      |
| PLAT794_ALERT_5_G Tentative Bond Valency for Cu1 (II) .....        | 2.17 Note    |
| PLAT869_ALERT_4_G ALERTS Related to the use of SQUEEZE Suppressed  | ! Info       |
| PLAT910_ALERT_3_G Missing # of FCF Reflection(s) Below Th(Min) ... | 2 Report     |
| PLAT912_ALERT_4_G Missing # of FCF Reflections Above STh/L= 0.600  | 6 Note       |
| PLAT961_ALERT_5_G Dataset Contains no Negative Intensities .....   | Please Check |

0 **ALERT level A** = Most likely a serious problem - resolve or explain

0 **ALERT level B** = A potentially serious problem, consider carefully  
3 **ALERT level C** = Check. Ensure it is not caused by an omission or oversight  
7 **ALERT level G** = General information/check it is not something unexpected

1 ALERT type 1 CIF construction/syntax error, inconsistent or missing data  
0 ALERT type 2 Indicator that the structure model may be wrong or deficient  
3 ALERT type 3 Indicator that the structure quality may be low  
3 ALERT type 4 Improvement, methodology, query or suggestion  
3 ALERT type 5 Informative message, check

---

## Datablock: Compound4

---

Bond precision: C-C = 0.0034 A

Wavelength=0.71069

Cell: a=7.4426(4) b=10.2904(6) c=11.4557(7)  
alpha=75.615(2) beta=71.959(3) gamma=85.198(2)  
Temperature: 296 K

|                | Calculated            | Reported              |
|----------------|-----------------------|-----------------------|
| Volume         | 808.05(8)             | 808.05(8)             |
| Space group    | P -1                  | P -1                  |
| Hall group     | -P 1                  | -P 1                  |
| Moiety formula | C32 H30 Cu2 N4 O10 S2 | C32 H30 Cu2 N4 O10 S2 |
| Sum formula    | C32 H30 Cu2 N4 O10 S2 | C32 H30 Cu2 N4 O10 S2 |
| Mr             | 821.82                | 821.80                |
| Dx, g cm-3     | 1.689                 | 1.689                 |
| Z              | 1                     | 1                     |
| Mu (mm-1)      | 1.512                 | 1.512                 |
| F000           | 420.0                 | 420.0                 |
| F000'          | 421.05                |                       |
| h,k,lmax       | 9,12,14               | 9,12,14               |
| Nref           | 3332                  | 3327                  |
| Tmin,Tmax      | 0.704,0.782           | 0.800,0.900           |
| Tmin'          | 0.548                 |                       |

Correction method= # Reported T Limits: Tmin=0.800 Tmax=0.900  
AbsCorr = MULTI-SCAN

Data completeness= 0.998

Theta(max)= 26.410

R(reflections)= 0.0349( 3120)

wR2(reflections)= 0.0952( 3327)

S = 1.098

Npar= 229

---

The following ALERTS were generated. Each ALERT has the format  
**test-name\_ALERT\_alert-type\_alert-level**.  
Click on the hyperlinks for more details of the test.

---

### ● Alert level C

|                   |                                                  |      |        |
|-------------------|--------------------------------------------------|------|--------|
| PLAT094_ALERT_2_C | Ratio of Maximum / Minimum Residual Density .... | 3.37 | Report |
| PLAT480_ALERT_4_C | Long H...A H-Bond Reported H10 .. S2 ..          | 2.92 | Ang.   |
| PLAT911_ALERT_3_C | Missing # FCF Refl Between THmin & STh/L= 0.600  | 3    | Report |

### ● Alert level G

|                   |                                                  |      |              |
|-------------------|--------------------------------------------------|------|--------------|
| PLAT002_ALERT_2_G | Number of Distance or Angle Restraints on AtSite | 2    | Note         |
| PLAT172_ALERT_4_G | The CIF-Embedded .res File Contains DFIX Records | 1    | Report       |
| PLAT794_ALERT_5_G | Tentative Bond Valency for Cu1 (II) .....        | 2.15 | Note         |
| PLAT860_ALERT_3_G | Number of Least-Squares Restraints .....         | 1    | Note         |
| PLAT910_ALERT_3_G | Missing # of FCF Reflection(s) Below Th(Min) ... | 2    | Report       |
| PLAT961_ALERT_5_G | Dataset Contains no Negative Intensities .....   |      | Please Check |

0 **ALERT level A** = Most likely a serious problem - resolve or explain  
0 **ALERT level B** = A potentially serious problem, consider carefully  
3 **ALERT level C** = Check. Ensure it is not caused by an omission or oversight  
6 **ALERT level G** = General information/check it is not something unexpected

0 ALERT type 1 CIF construction/syntax error, inconsistent or missing data  
2 ALERT type 2 Indicator that the structure model may be wrong or deficient  
3 ALERT type 3 Indicator that the structure quality may be low  
2 ALERT type 4 Improvement, methodology, query or suggestion  
2 ALERT type 5 Informative message, check

## Datablock: Compound5

Bond precision: C-C = 0.0059 A

Wavelength=0.71069

|              |             |                 |               |
|--------------|-------------|-----------------|---------------|
| Cell:        | a=6.9512(9) | b=18.534(2)     | c=13.4906(15) |
|              | alpha=90    | beta=100.283(3) | gamma=90      |
| Temperature: | 150 K       |                 |               |

|                        | Calculated            | Reported              |
|------------------------|-----------------------|-----------------------|
| Volume                 | 1710.1(3)             | 1710.1(4)             |
| Space group            | P 21/n                | P 21/n                |
| Hall group             | -P 2yn                | -P 2yn                |
| Moiety formula         | C32 H36 Cu2 N4 O10 S2 | C32 H36 Cu2 N4 O10 S2 |
| Sum formula            | C32 H36 Cu2 N4 O10 S2 | C32 H36 Cu2 N4 O10 S2 |
| Mr                     | 827.87                | 827.85                |
| Dx, g cm <sup>-3</sup> | 1.608                 | 1.608                 |
| Z                      | 2                     | 2                     |
| Mu (mm <sup>-1</sup> ) | 1.429                 | 1.429                 |
| F000                   | 852.0                 | 852.0                 |
| F000'                  | 854.10                |                       |
| h,k,lmax               | 8,23,16               | 8,23,16               |
| Nref                   | 3513                  | 3506                  |
| Tmin,Tmax              | 0.747,0.918           | 0.627,0.919           |
| Tmin'                  | 0.598                 |                       |

Correction method= # Reported T Limits: Tmin=0.627 Tmax=0.919  
AbsCorr = MULTI-SCAN

Data completeness= 0.998

Theta(max)= 26.418

R(reflections)= 0.0526( 2114)

wR2(reflections)= 0.1035( 3506)

S = 0.920

Npar= 229

---

The following ALERTS were generated. Each ALERT has the format  
**test-name\_ALERT\_alert-type\_alert-level.**  
Click on the hyperlinks for more details of the test.

---

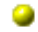

#### Alert level C

RINTA01\_ALERT\_3\_C The value of Rint is greater than 0.12

Rint given 0.129

PLAT420\_ALERT\_2\_C D-H Without Acceptor N12 -- H12 ... Please Check  
PLAT906\_ALERT\_3\_C Large K value in the Analysis of Variance ..... 6.996 Check

---

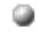

#### Alert level G

PLAT002\_ALERT\_2\_G Number of Distance or Angle Restraints on AtSite 2 Note  
PLAT007\_ALERT\_5\_G Number of Unrefined Donor-H Atoms ..... 1 Report  
PLAT172\_ALERT\_4\_G The CIF-Embedded .res File Contains DFIX Records 1 Report  
PLAT794\_ALERT\_5\_G Tentative Bond Valency for Cu1 (II) ..... 2.19 Note  
PLAT860\_ALERT\_3\_G Number of Least-Squares Restraints ..... 1 Note  
PLAT912\_ALERT\_4\_G Missing # of FCF Reflections Above STh/L= 0.600 8 Note  
PLAT961\_ALERT\_5\_G Dataset Contains no Negative Intensities ..... Please Check

---

- 0 **ALERT level A** = Most likely a serious problem - resolve or explain  
0 **ALERT level B** = A potentially serious problem, consider carefully  
3 **ALERT level C** = Check. Ensure it is not caused by an omission or oversight  
7 **ALERT level G** = General information/check it is not something unexpected

- 0 ALERT type 1 CIF construction/syntax error, inconsistent or missing data  
2 ALERT type 2 Indicator that the structure model may be wrong or deficient  
3 ALERT type 3 Indicator that the structure quality may be low  
2 ALERT type 4 Improvement, methodology, query or suggestion  
3 ALERT type 5 Informative message, check
-

It is advisable to attempt to resolve as many as possible of the alerts in all categories. Often the minor alerts point to easily fixed oversights, errors and omissions in your CIF or refinement strategy, so attention to these fine details can be worthwhile. In order to resolve some of the more serious problems it may be necessary to carry out additional measurements or structure refinements. However, the purpose of your study may justify the reported deviations and the more serious of these should normally be commented upon in the discussion or experimental section of a paper or in the "special\_details" fields of the CIF. checkCIF was carefully designed to identify outliers and unusual parameters, but every test has its limitations and alerts that are not important in a particular case may appear. Conversely, the absence of alerts does not guarantee there are no aspects of the results needing attention. It is up to the individual to critically assess their own results and, if necessary, seek expert advice.

### **Publication of your CIF in IUCr journals**

A basic structural check has been run on your CIF. These basic checks will be run on all CIFs submitted for publication in IUCr journals (*Acta Crystallographica*, *Journal of Applied Crystallography*, *Journal of Synchrotron Radiation*); however, if you intend to submit to *Acta Crystallographica Section C* or *E*, you should make sure that full publication checks are run on the final version of your CIF prior to submission.

### **Publication of your CIF in other journals**

Please refer to the *Notes for Authors* of the relevant journal for any special instructions relating to CIF submission.



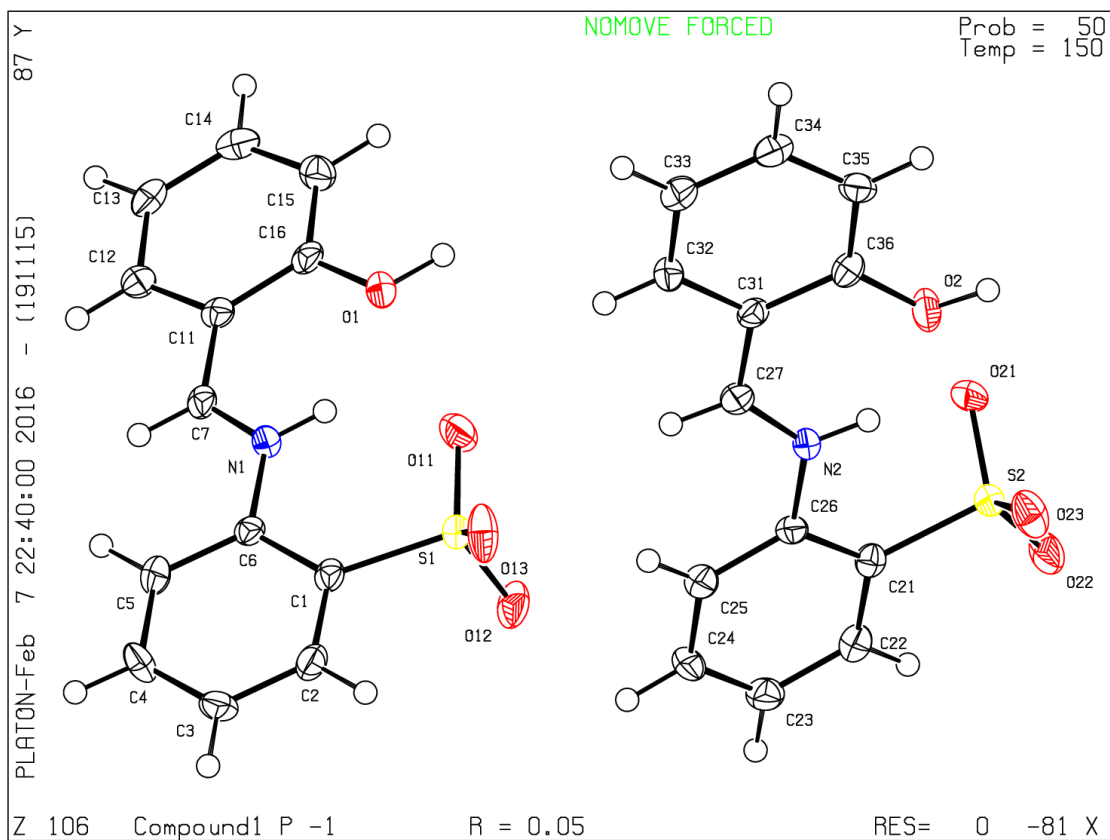

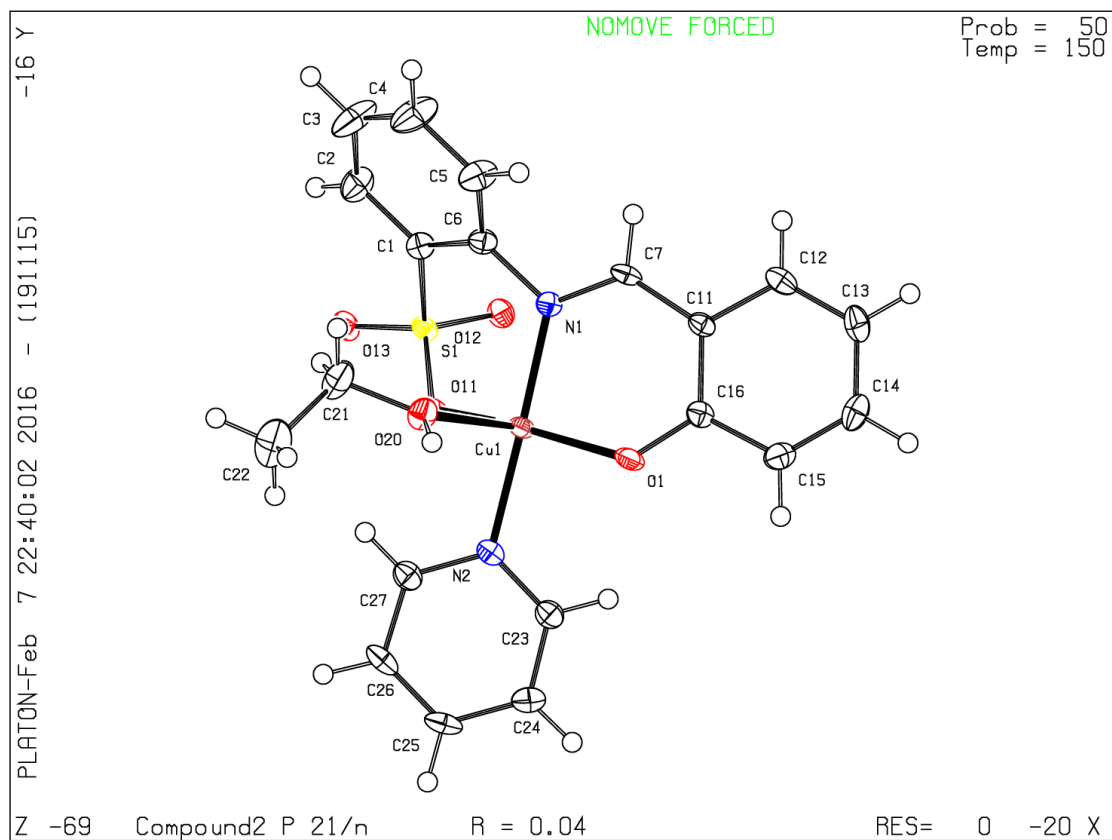

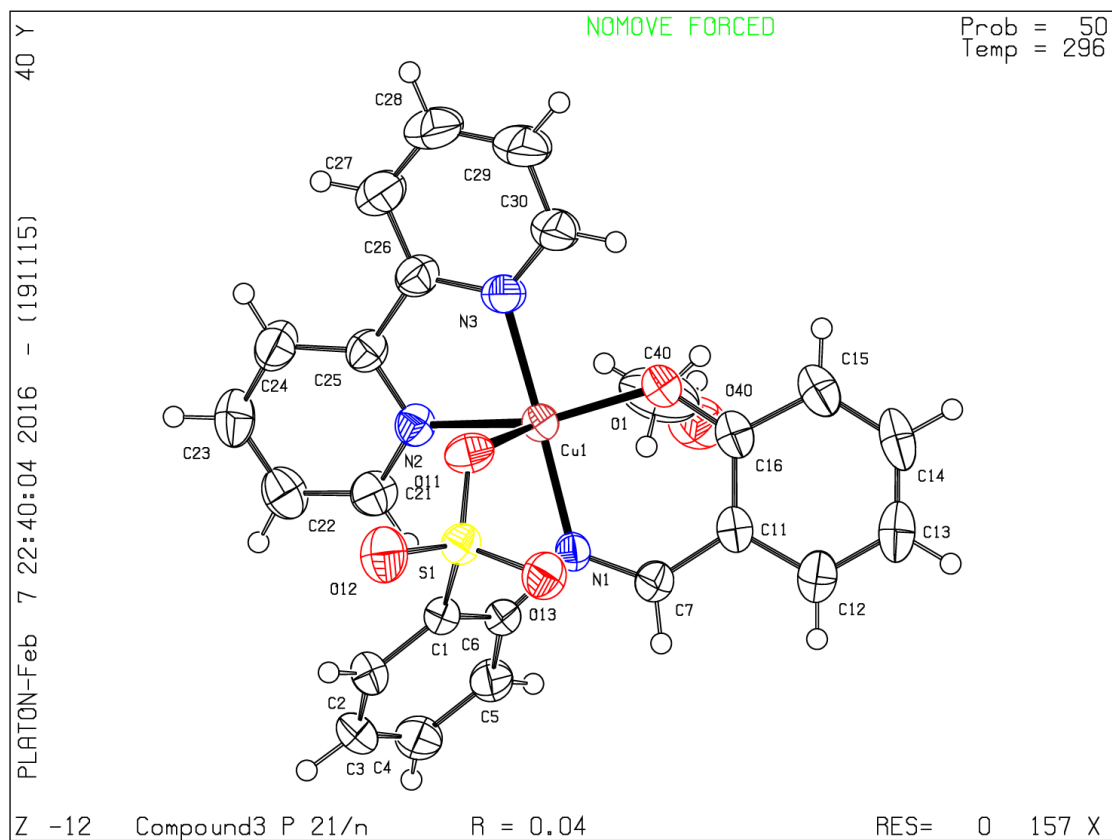

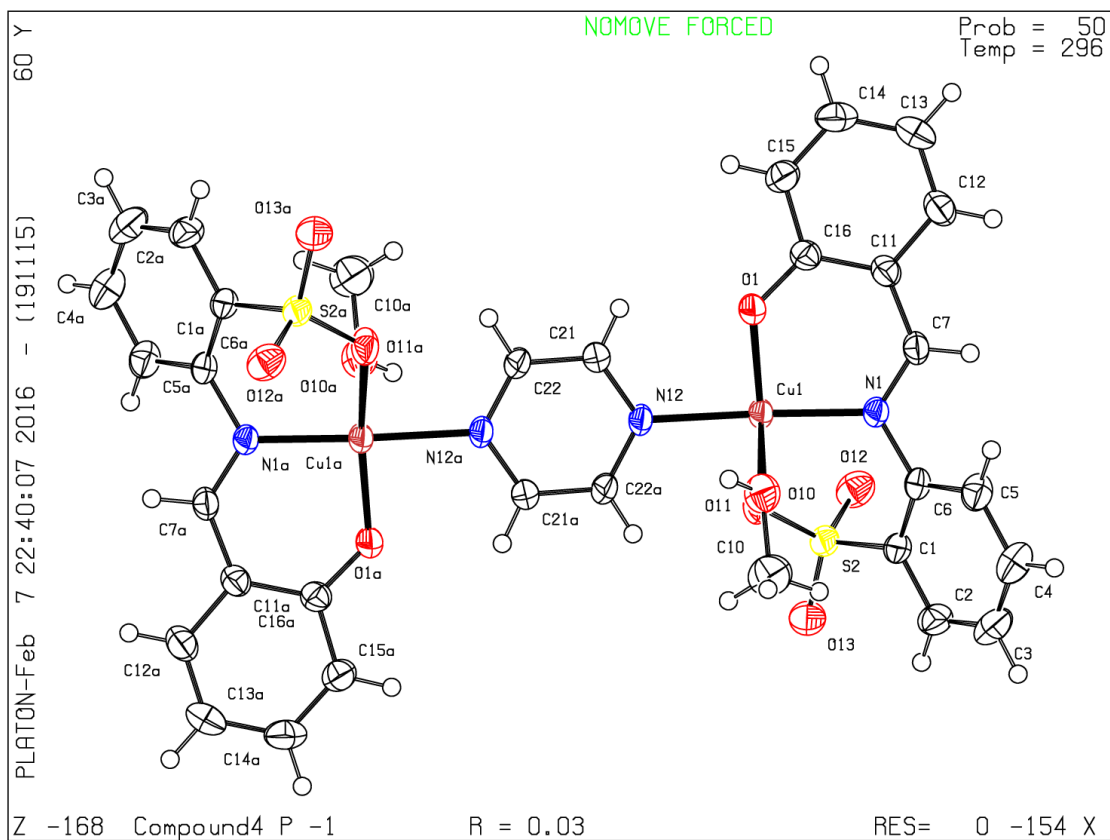

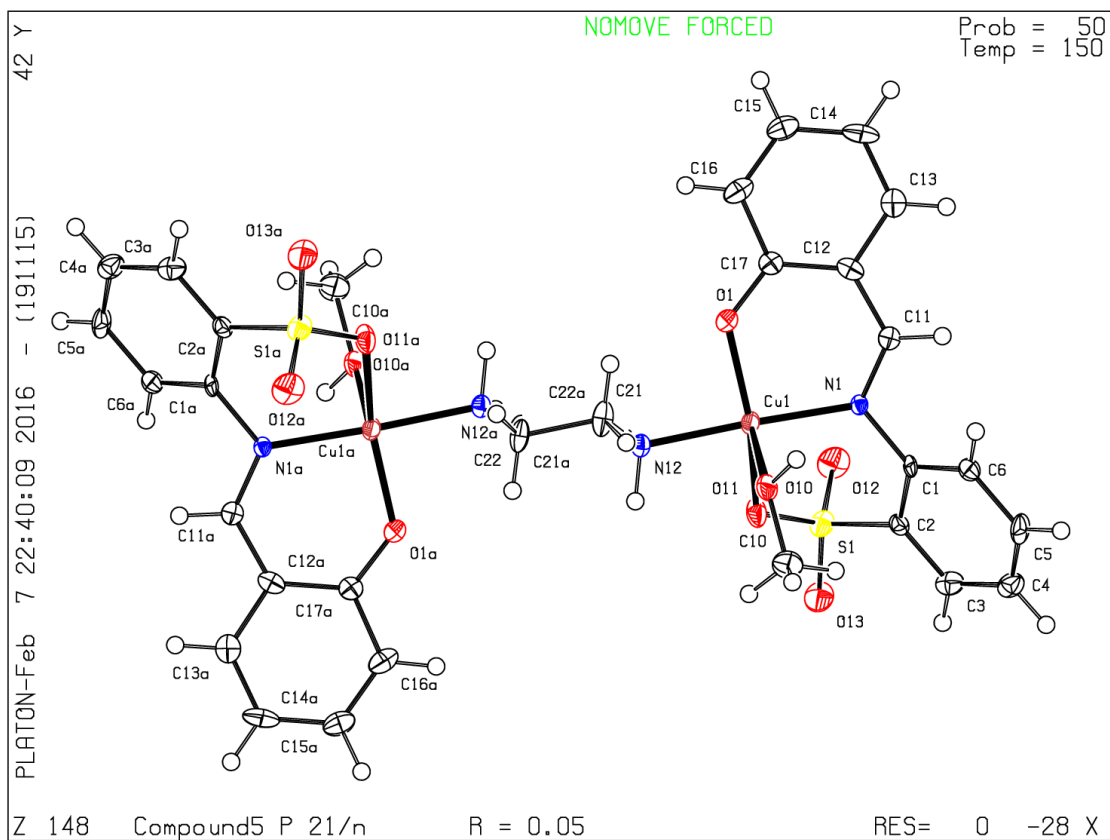

Supplement: s1 [file s1]
