# Supplementary material
Source: MDPI journal article supplement (https://www.mdpi.com/2304-6740/7/2/17)
Supplement: s1 [file s1]

# Supplementary Materials: Syntheses, Structures, and Catalytic Hydrocarbon Oxidation Properties of *N*-Heterocycle-Sulfonated Schiff Base Copper(II) Complexes

Susanta Hazra \*, Bruno G. M. Rocha, M. Fátima C. Guedes da Silva \*, Anirban Karmakar, and Armando J. L. Pombeiro \*

## H-Bonded Networks in 1–5

The crystal lattices of all the five compounds (**1–5**) are stabilized by H-bonding interactions. In the crystal lattice of the Schiff base (**1**), imine, phenolic (as acceptors and donors) and sulfonate groups (as donors) are involved in H-bonding interactions, whereas the coordinated (**2**, **4** and **5**) or non-coordinated (**3**) solvent molecules (methanol as donors) in addition to the sulfonate groups (as acceptors) are responsible for such a type of interactions in the lattices of the metal complexes.

The molecular structure of the Schiff base (**1**) is stabilized by intramolecular H-bonds (Figures 1 and S1, Table S1) but the crystal lattice contains two additional intermolecular interactions,  $O1-H1O\cdots O22^i$  and  $O2^{ii}-H2O^{ii}\cdots O13$ , which are responsible for the formation of a *zigzag* 1D chain as shown in Figures S1 and S2. In both cases the sulfonate oxygen atoms ( $O13$  and  $O22^i$ ) act as strong acceptors (Table S1) to the phenolic OH moieties ( $O1-H1O$  and  $O2^{ii}-H2O^{ii}$ ) of two vicinal molecules.

The crystal lattices of the copper(II) complexes (**2–5**) contain only a strong hydrogen bonding interaction involving a non-coordinated sulfonate oxygen ( $O12$  or  $O12^{ii}$ ) and the coordinated ethanol (in **2**) or methanol (in **3–5**) solvent molecule.

As shown in Figures 2 and S3, a non-coordinated oxygen atom ( $O12$  in **2** and **4** and  $O13$  in **3** and **5**) of the sulfonate group acts as a strong acceptor (Table S1) and interacts with the alcoholic (ethanol in **2** and methanol in **3–5**) proton of a vicinal molecule forming linear 1D (in **2**), hacksaw double chain 1D (in **4**), 2D motif (in **5**) but no dimensionality in **3**. The double coordination of 2,2'-bipyridine in compound **3** (Figure 2) prevents the coordination of methanol which makes H-bonds with the asymmetric unit but without interacting with any vicinal molecule, thus producing no dimensionality in the crystal lattice. In all the other complexes (**2**, **4** and **5**), the coordinated methanol makes the alcoholic proton easily available for the vicinal molecule and thus acts as strong donor to build interesting supramolecular structures with various dimensionalities (Figure S3).

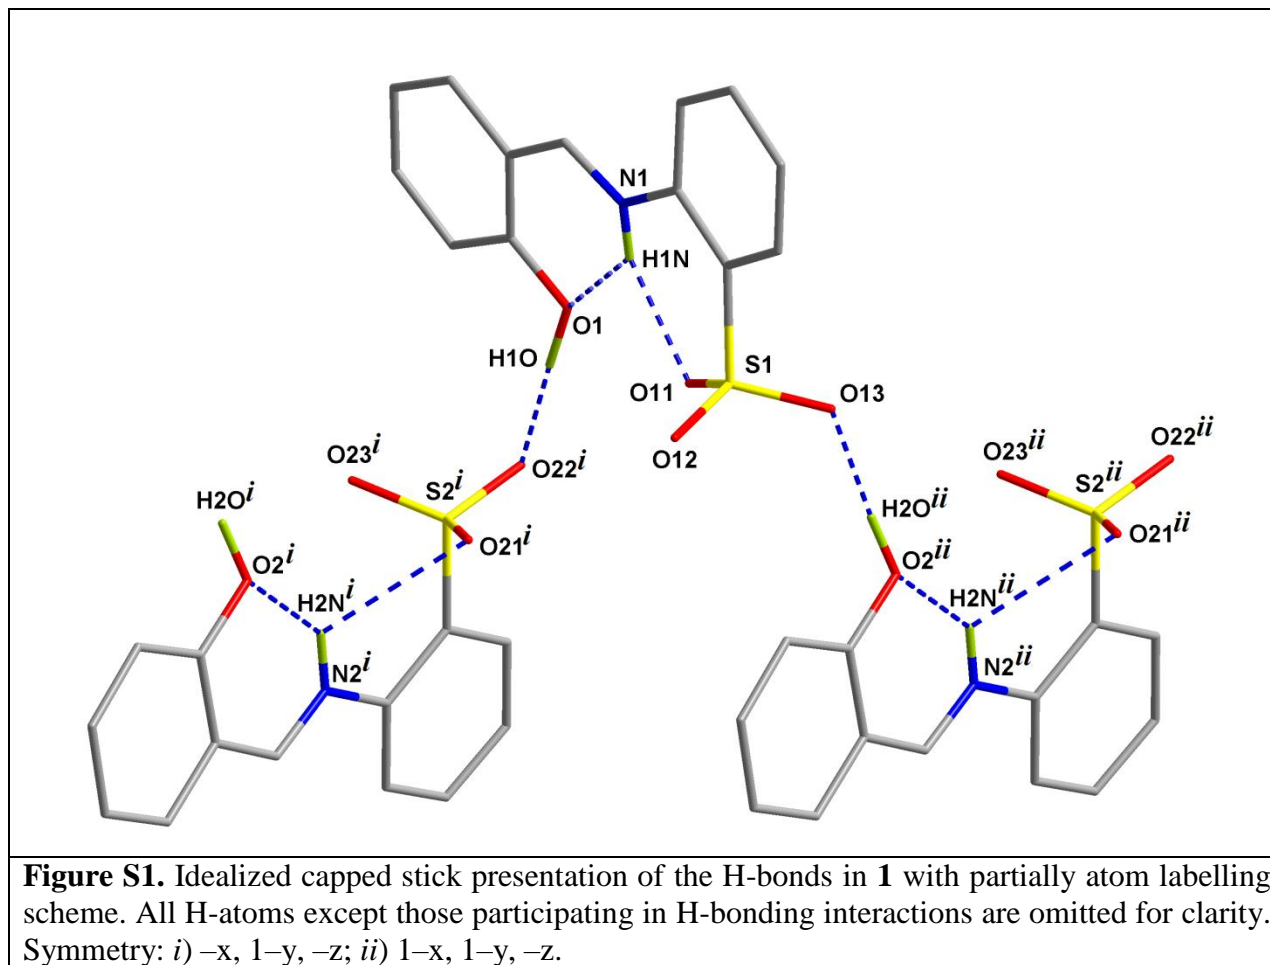

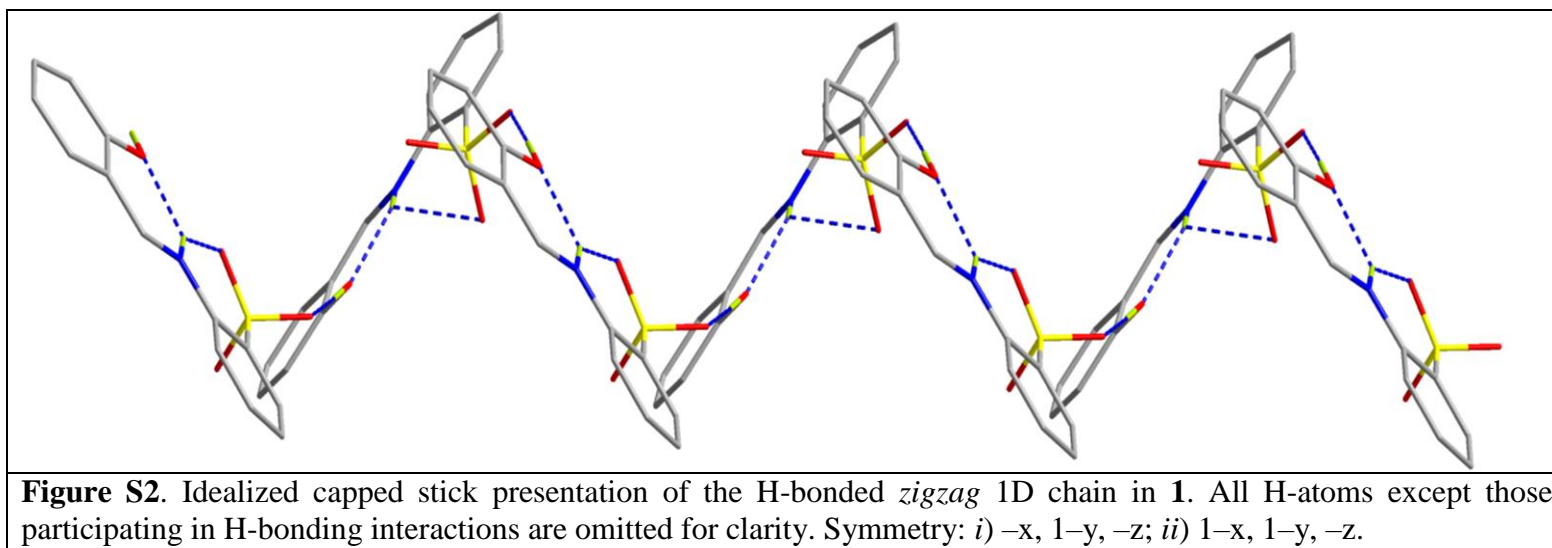

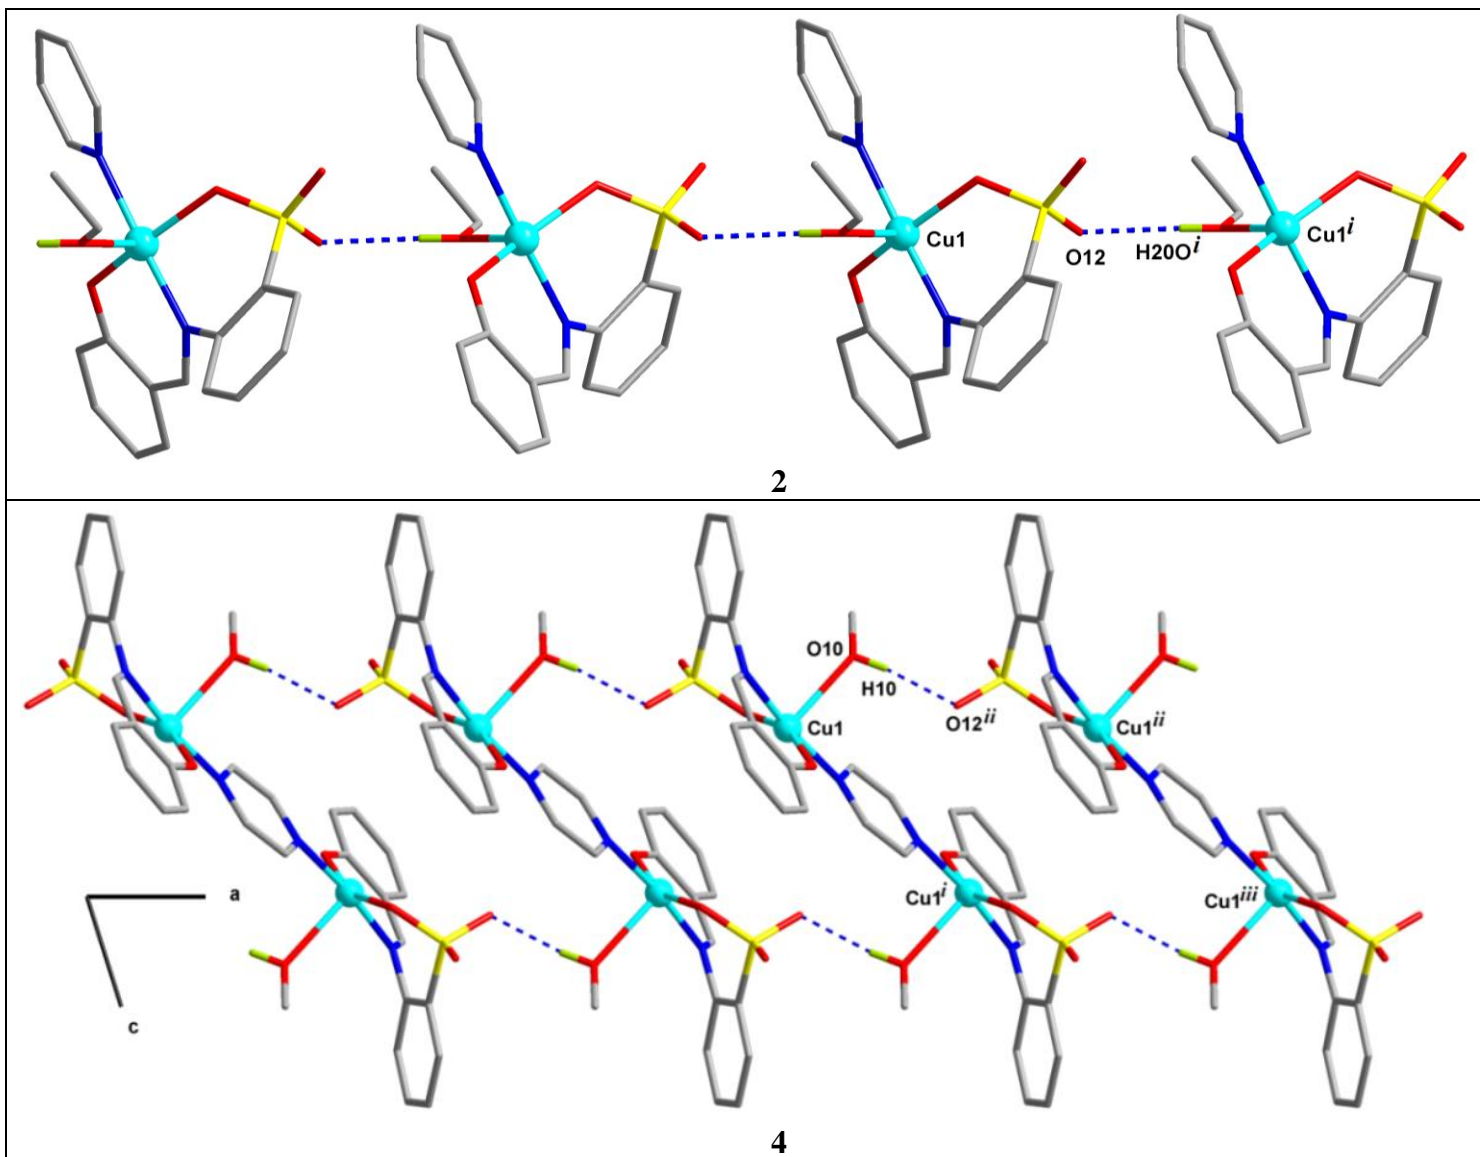

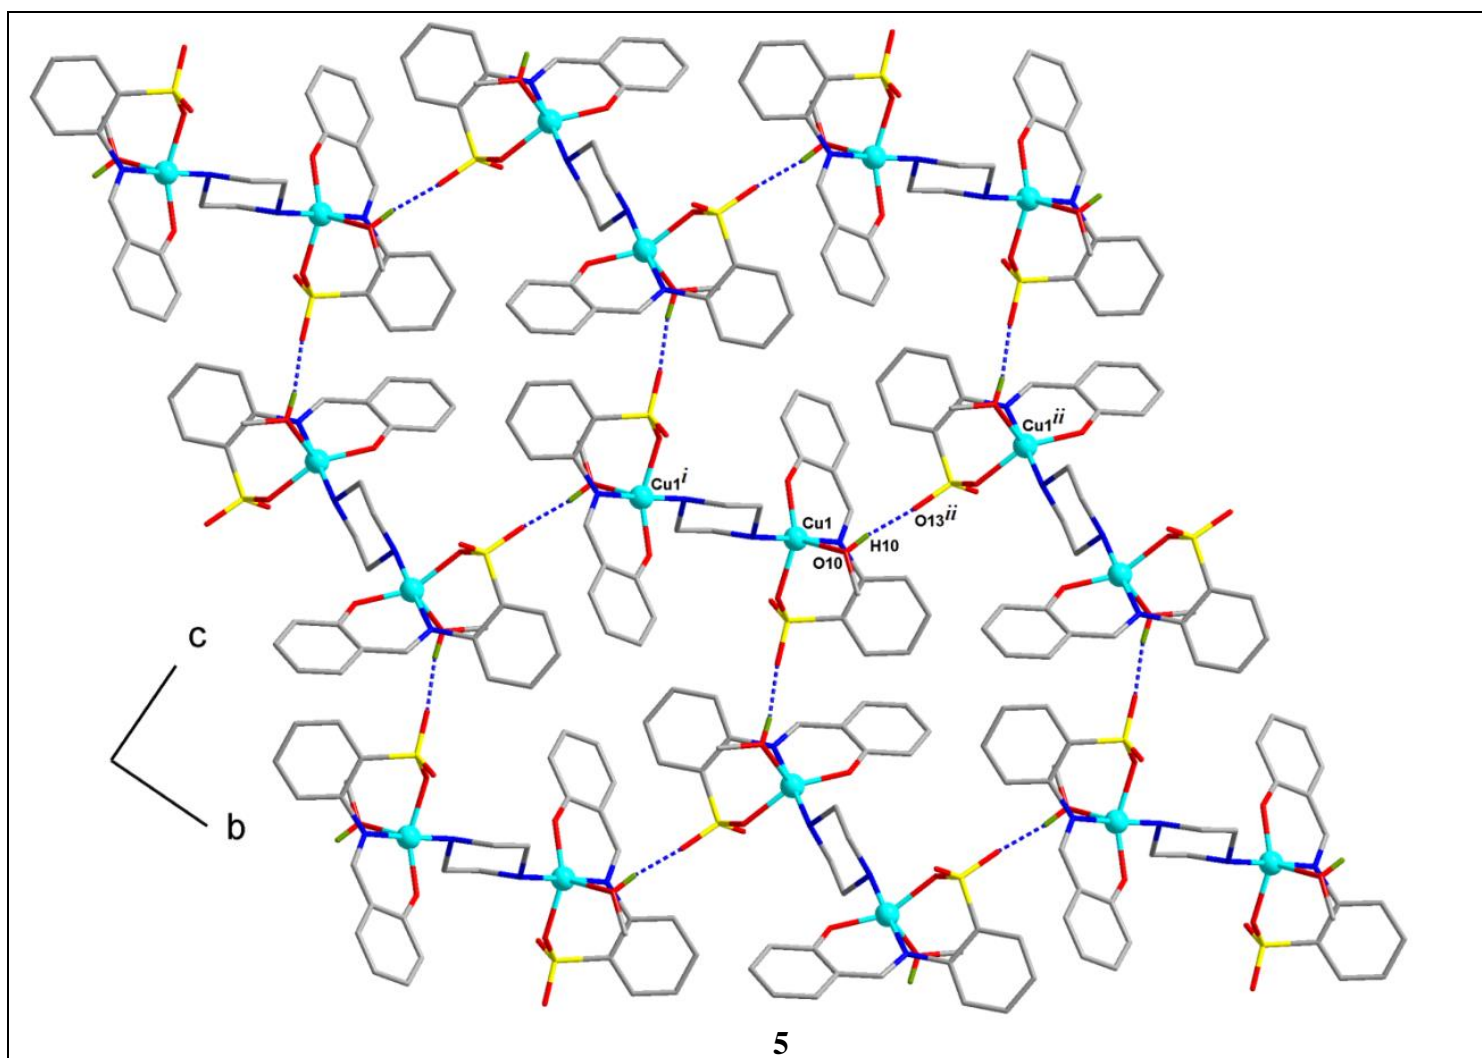

**Figure S3.** Idealized capped stick presentations of the H-bonded linear 1D in **2**, double chain 1D in **4** and 2D motif in **5**. All H-atoms except those participating in H-bonding are omitted for clarity. Symmetry: (*i*)  $0.5+x, 0.5-y, -0.5+z$  (in **2**); (*i*)  $1-x, -y, 1-z$ ; (*ii*)  $1+x, y, z$ ; (*iii*)  $2-x, -y, 1-z$  (in **4**) and (*i*)  $2-x, -y, -z$ ; (*ii*)  $0.5+x, 0.5-y, 0.5+z$  (in **5**).

**Table S1.** Geometries [distances in (Å) and angles in (°)] of the H-bonds in **1–5**.

| Compound | D–H···A                                               | D···A | H···A | D–H···A |
|----------|-------------------------------------------------------|-------|-------|---------|
| <b>1</b> | N1–H1N···O1                                           | 2.647 | 1.98  | 131.4   |
|          | N1–H1N···O11                                          | 2.725 | 1.99  | 140.1   |
|          | O1–H1O···O22 <sup>i</sup>                             | 2.593 | 1.62  | 174.0   |
|          | N2 <sup>i</sup> –H2N <sup>i</sup> ···O2 <sup>i</sup>  | 2.626 | 1.95  | 133.0   |
|          | O2 <sup>ii</sup> –H2O <sup>ii</sup> ···O13            | 2.606 | 1.69  | 174.0   |
|          | N2 <sup>i</sup> –H2N <sup>i</sup> ···O21 <sup>i</sup> | 3.015 | 2.48  | 119.3   |
|          |                                                       |       |       |         |
| <b>2</b> | O20 <sup>i</sup> –H20O <sup>i</sup> ···O12            | 2.807 | 2.02  | 170.2   |
|          |                                                       |       |       |         |
| <b>3</b> | O40 <sup>i</sup> –H40 <sup>i</sup> ···O13             | 2.792 | 1.97  | 175.5   |
|          |                                                       |       |       |         |
| <b>4</b> | O10–H10···O12 <sup>ii</sup>                           | 2.760 | 1.95  | 172.0   |
|          |                                                       |       |       |         |
| <b>5</b> | O10–H10···O13 <sup>ii</sup>                           | 2.730 | 1.85  | 171.0   |
|          |                                                       |       |       |         |

**Table S2.** Tests concerning the oxidation of cyclooctane in the presence of H<sub>2</sub>L (**1**) and in the absence of any metal catalyst (blank tests).<sup>a</sup>

| Entry | Time (h) | No additive            |                  | Py                     |                  | HNO <sub>3</sub>       |                  |
|-------|----------|------------------------|------------------|------------------------|------------------|------------------------|------------------|
|       |          | Yield <sup>b</sup> , % | TON <sup>c</sup> | Yield <sup>b</sup> , % | TON <sup>c</sup> | Yield <sup>b</sup> , % | TON <sup>c</sup> |
| 1     | 0        | 0                      | 0                | 0                      | 0                | 0                      | 0                |
| 2     | 2        | 0.01                   | 0                | 0                      | 0                | 1.14                   | 3                |
| 3     | 4        | 0.31                   | 1                | 0                      | 0                | 1.83                   | 5                |
| 4     | 8        | 0.28                   | 1                | 0.17                   | 0                | 2.13                   | 5                |
| 5     | 24       | 0.19                   | 0                | 0.52                   | 1                | 2.30                   | 6                |
| 6     | 32       | 0.17                   | 0                | 0.84                   | 2                | 2.70                   | 7                |

<sup>a</sup> Reaction conditions: cyclooctane (0.25 M), **1** (10<sup>−3</sup> M), additive (0.072 M), H<sub>2</sub>O<sub>2</sub> (1.2 M) in acetonitrile at 60 °C; total volume of reaction mixture is 10 mL. <sup>b</sup> Amounts of cyclooctanone and cyclooctanol were determined after reduction of the aliquots with PPh<sub>3</sub>; when the yield was above zero, only cyclooctanol was detected in a measurable amount. <sup>c</sup> Turnover number of the catalyst (sum of moles of all products per mole of **1**).

**Table S3.** Results obtained before the reduction with PPh<sub>3</sub> of the aliquots of the oxidation of cyclooctane catalyzed by **3**.<sup>a</sup>

| Entry | Time (min) | Yield <sup>b</sup> , % | Selectivity <sup>c</sup> | TON <sup>d</sup> |
|-------|------------|------------------------|--------------------------|------------------|
| 1     | 0          | 0                      | -                        | 0                |
| 2     | 4          | 3                      | 82:18                    | 8                |
| 3     | 9          | 8                      | 84:16                    | 20               |
| 4     | 120        | 19                     | 85:15                    | 48               |

<sup>a</sup> Reaction conditions: cyclooctane (0.25 M), complex **3** (10<sup>−3</sup> M per copper), H<sub>2</sub>O<sub>2</sub> (1.2 M) in acetonitrile at 60 °C; total volume of reaction mixture is 10 mL. <sup>b</sup> Amounts of cyclooctanone and cyclooctanol were determined before reduction of the aliquots with PPh<sub>3</sub> (for this method see ref. 19). <sup>c</sup> Cyclooctanone/cyclooctanol ratio. <sup>d</sup> Turnover number of the catalyst (sum of moles of all products per mole of **3**).

**Table S4.** Crystallographic Data for **1–5**.

|                                                                                                                        | <b>1</b>                                          | <b>2</b>                                                          | <b>3</b>                                                          | <b>4</b>                                                                                      | <b>5</b>                                                                                      |
|------------------------------------------------------------------------------------------------------------------------|---------------------------------------------------|-------------------------------------------------------------------|-------------------------------------------------------------------|-----------------------------------------------------------------------------------------------|-----------------------------------------------------------------------------------------------|
| Formula                                                                                                                | C <sub>13</sub> H <sub>11</sub> NO <sub>4</sub> S | C <sub>20</sub> H <sub>20</sub> CuN <sub>2</sub> O <sub>5</sub> S | C <sub>24</sub> H <sub>21</sub> CuN <sub>3</sub> O <sub>5</sub> S | C <sub>32</sub> H <sub>30</sub> Cu <sub>2</sub> N <sub>4</sub> O <sub>10</sub> S <sub>2</sub> | C <sub>32</sub> H <sub>36</sub> Cu <sub>2</sub> N <sub>4</sub> O <sub>10</sub> S <sub>2</sub> |
| FW                                                                                                                     | 277.29                                            | 463.98                                                            | 527.04                                                            | 821.80                                                                                        | 827.85                                                                                        |
| Crystal colour                                                                                                         | Yellow                                            | Green                                                             | Green                                                             | Green                                                                                         | Green                                                                                         |
| Crystal system                                                                                                         | Triclinic                                         | Monoclinic                                                        | Monoclinic                                                        | Triclinic                                                                                     | Monoclinic                                                                                    |
| Space group                                                                                                            | <i>P</i> -1                                       | <i>P</i> 21/ <i>n</i>                                             | <i>P</i> 21/ <i>n</i>                                             | <i>P</i> -1                                                                                   | <i>P</i> 21/ <i>n</i>                                                                         |
| <i>a</i> /Å                                                                                                            | 9.0847(6)                                         | 9.5036(4)                                                         | 8.1099(2)                                                         | 7.4426(4)                                                                                     | 6.9512(9)                                                                                     |
| <i>b</i> /Å                                                                                                            | 10.5878(8)                                        | 18.3619(8)                                                        | 29.4538(7)                                                        | 10.2904(6)                                                                                    | 18.534(2)                                                                                     |
| <i>c</i> /Å                                                                                                            | 13.3058(9)                                        | 11.3390(5)                                                        | 10.5303(3)                                                        | 11.4557(7)                                                                                    | 13.4906(15)                                                                                   |
| $\alpha$ /°                                                                                                            | 70.313(3)                                         | 90.00                                                             | 90.00                                                             | 75.615(2)                                                                                     | 90.00                                                                                         |
| $\beta$ /°                                                                                                             | 82.104(3)                                         | 91.883(2)                                                         | 109.3950(9)                                                       | 71.959(3)                                                                                     | 100.283(3)                                                                                    |
| $\gamma$ /°                                                                                                            | 76.733(3)                                         | 90.00                                                             | 90.00                                                             | 85.198(2)                                                                                     | 90.00                                                                                         |
| <i>V</i> /Å <sup>3</sup>                                                                                               | 1170.35(14)                                       | 1977.63(15)                                                       | 2372.60(11)                                                       | 808.05(8)                                                                                     | 1710.1(4)                                                                                     |
| <i>Z</i>                                                                                                               | 4                                                 | 4                                                                 | 4                                                                 | 1                                                                                             | 2                                                                                             |
| <i>T</i> /K                                                                                                            | 150(2)                                            | 150(2)                                                            | 296(2)                                                            | 296(2)                                                                                        | 150(2)                                                                                        |
| $2\theta$ /°                                                                                                           | 5.48 – 50.70                                      | 4.22 – 50.72                                                      | 4.94 – 52.74                                                      | 4.92 – 52.82                                                                                  | 3.78 – 52.84                                                                                  |
| $\mu$ (Mo K $\alpha$ )/mm <sup>−1</sup>                                                                                | 0.286                                             | 1.245                                                             | 1.049                                                             | 1.512                                                                                         | 1.429                                                                                         |
| $\rho_{\text{calcd}}$ /g cm <sup>−3</sup>                                                                              | 1.574                                             | 1.558                                                             | 1.475                                                             | 1.689                                                                                         | 1.608                                                                                         |
| <i>F</i> (000)                                                                                                         | 576                                               | 956                                                               | 1084                                                              | 420                                                                                           | 852                                                                                           |
| Absorption-correction                                                                                                  | Multi-scan                                        | Multi-scan                                                        | Multi-scan                                                        | Multi-scan                                                                                    | Multi-scan                                                                                    |
| Index ranges                                                                                                           | −10 < <i>h</i> < 10                               | −11 < <i>h</i> < 11                                               | −9 < <i>h</i> < 10                                                | −9 < <i>h</i> < 9                                                                             | −8 < <i>h</i> < 7                                                                             |
|                                                                                                                        | −12 < <i>k</i> < 12                               | −21 < <i>k</i> < 22                                               | −36 < <i>k</i> < 34                                               | −12 < <i>k</i> < 12                                                                           | −23 < <i>k</i> < 22                                                                           |
|                                                                                                                        | −13 < <i>l</i> < 16                               | −13 < <i>l</i> < 10                                               | −13 < <i>l</i> < 13                                               | −14 < <i>l</i> < 14                                                                           | −16 < <i>l</i> < 16                                                                           |
| Reflections collected                                                                                                  | 9969                                              | 14180                                                             | 24195                                                             | 15098                                                                                         | 13661                                                                                         |
| Independent reflections                                                                                                | 4194                                              | 3629                                                              | 4826                                                              | 3327                                                                                          | 3506                                                                                          |
| <i>R</i> <sub>int</sub>                                                                                                | 0.0560                                            | 0.0555                                                            | 0.0350                                                            | 0.0183                                                                                        | 0.1286                                                                                        |
| <i>R</i> <sub>1</sub> <sup>a</sup> /w <i>R</i> <sub>2</sub> <sup>b</sup> [ <i>I</i> > 2σ( <i>I</i> )]                  | 0.0510/0.0991                                     | 0.0373/0.0759                                                     | 0.0398/0.0963                                                     | 0.0349/0.0932                                                                                 | 0.0526/0.0901                                                                                 |
| <i>R</i> <sub>1</sub> <sup>a</sup> /w <i>R</i> <sub>2</sub> <sup>b</sup> [for all <i>F</i> <sub>o</sub> <sup>2</sup> ] | 0.1101/0.1129                                     | 0.0594/0.0838                                                     | 0.0534/0.1028                                                     | 0.0371/0.0952                                                                                 | 0.1145/0.1035                                                                                 |
| GOF on <i>F</i> <sup>2</sup>                                                                                           | 0.919                                             | 1.017                                                             | 1.007                                                             | 1.098                                                                                         | 0.920                                                                                         |



**Table S5.** Effect of the presence of diphenylamine on the oxidation of cyclooctane catalyzed by **3**.<sup>a</sup>

| Entry | Time (min) | Yield <sup>b</sup> , % | Selectivity <sup>c</sup> | TON <sup>d</sup> | Yield drop <sup>e</sup> owing to Ph <sub>2</sub> NH, % |
|-------|------------|------------------------|--------------------------|------------------|--------------------------------------------------------|
| 1     | 0          | 0                      | -                        | 0                | 0                                                      |
| 2     | 5          | 3                      | 0:100                    | 8                | 5                                                      |
| 3     | 9          | 6                      | 3:97                     | 14               | 29                                                     |
| 4     | 120        | 10                     | 16:84                    | 25               | 53                                                     |

<sup>a</sup> Reaction conditions: cyclooctane (0.25 M), complex **3** ( $10^{-3}$  M per copper), H<sub>2</sub>O<sub>2</sub> (1.2 M), Ph<sub>2</sub>NH (1.2 M) in acetonitrile at 60 °C; total volume of reaction mixture is 10 mL. <sup>b</sup> Amounts of cyclooctanone and cyclooctanol were determined after reduction of the aliquots with PPh<sub>3</sub> (for this method see ref. 19). <sup>c</sup> Cyclooctanone/cyclooctanol ratio. <sup>d</sup> Turnover number of the catalyst (sum of moles of all products per mole of **3**). <sup>e</sup>  $(1 - \text{total yield with Ph}_2\text{NH} / \text{total yield without Ph}_2\text{NH}) \times 100$

**Table S6.** Effect of the presence of bromotrichloromethane on the oxidation of cyclooctane catalyzed by **3**.<sup>a</sup>

| Entry | Time (h) | Yield <sup>b</sup> , % | Selectivity <sup>c</sup> | TON <sup>d</sup> | Yield drop <sup>e</sup> owing to CBrCl <sub>3</sub> , % |
|-------|----------|------------------------|--------------------------|------------------|---------------------------------------------------------|
| 1     | 0        | 0                      | -                        | 0                | 0                                                       |
| 2     | 5        | 3                      | 0:100                    | 8                | 8                                                       |
| 3     | 9        | 6                      | 4:96                     | 14               | 32                                                      |
| 4     | 2        | 9                      | 17:83                    | 24               | 54                                                      |

<sup>a</sup> Reaction conditions: cyclooctane (0.25 M), complex **3** ( $10^{-3}$  M per copper), H<sub>2</sub>O<sub>2</sub> (1.2 M), CBrCl<sub>3</sub> (0.25 M) in acetonitrile at 60 °C; total volume of reaction mixture is 10 mL. <sup>b</sup> Amounts of cyclooctanone and cyclooctanol were determined after reduction of the aliquots with PPh<sub>3</sub> (for this method see ref. 19). <sup>c</sup> Cyclooctanone/cyclooctanol ratio. <sup>d</sup> Turnover number of the catalyst (sum of moles of all products per mole of **3**). <sup>e</sup>  $(1 - \text{total yield with CBrCl}_3 / \text{total yield without CBrCl}_3) \times 100$
